# Supplementary material
Source: PubMed Central journal article supplement (PMC6338851)
Supplement: pnas.1808403116.sapp.pdf [file pnas.1808403116.sapp.pdf]

## Supplementary Information for

### **Blacklisting variants common in private cohorts but not in public databases optimizes human exome analysis**

Patrick Maffucci<sup>#</sup>, Benedetta Bigio<sup>#</sup>, Franck Rapaport, Aurélie Cobat, Alessandro Borghesi, Marie Lopez, Etienne Patin, Alexandre Bolze, Lei Shang, Matthieu Bendavid, Eric M Scott, Peter D Stenson, Charlotte Cunningham-Rundles, David N Cooper, Joseph G Gleeson, Jacques Fellay, Lluís Quintana-Murci, Jean-Laurent Casanova, Laurent Abel, Bertrand Boisson<sup>‡</sup>, Yuval Itan<sup>‡</sup>

<sup>#,‡</sup>: Equal contributions

Corresponding authors:

Jean-Laurent Casanova – [casanova@rockefeller.edu](mailto:casanova@rockefeller.edu),

Yuval Itan – [yuval.itan@mssm.edu](mailto:yuval.itan@mssm.edu)

**This PDF file includes:**

Figs. S1 to S19

Tables S1 to S10

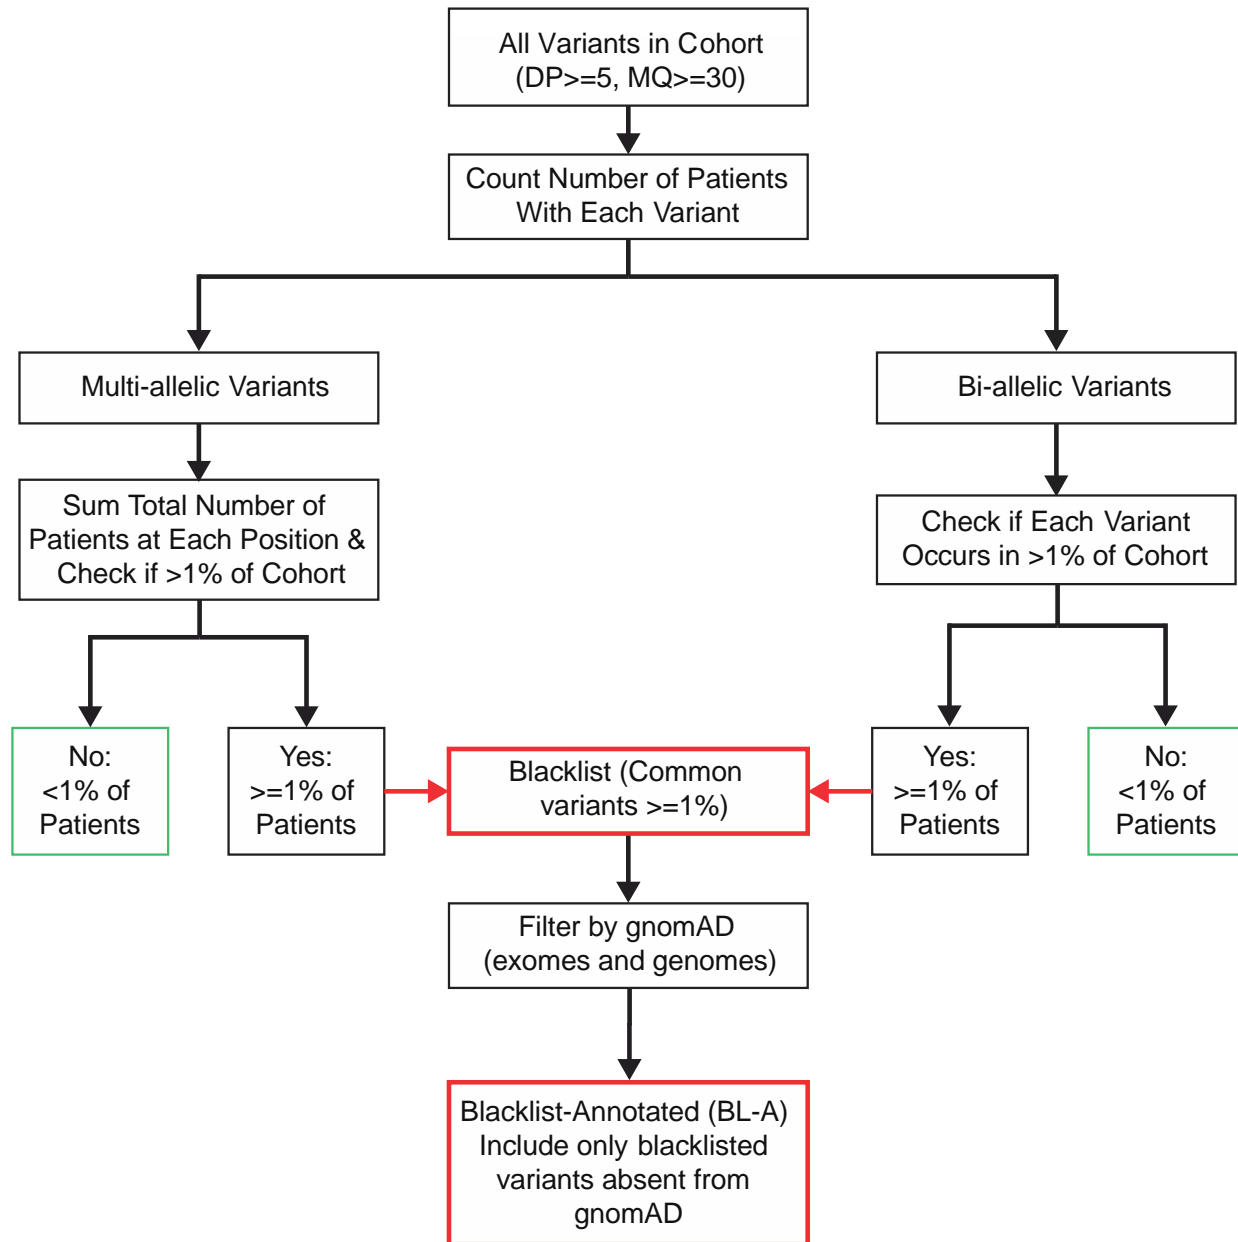

**Figure S1. Methodology for blacklist generation.** The blacklist was generated by first collecting unique high-quality variants ( $DP \geq 5$ ,  $MQ \geq 30$ ) from patient exomes and counting the occurrence of each variant. These variants were assembled into two classes: (1) biallelic, with a single alternative allele in our cohort; and (2) multiallelic, with two or more alternative alleles in the cohort, for which we collapsed all variants at a unique chromosomal position and summed the total number of patients containing these variants. We then collected the variants that had a frequency  $\geq 1\%$  in the cohort (the Blacklist: “Common in-house variants”). Of these variants, 21.4% (167,144) were absent from gnomAD exome and genome databases. We considered these 167,144 variants to be “blacklist-annotated” (BL-A).

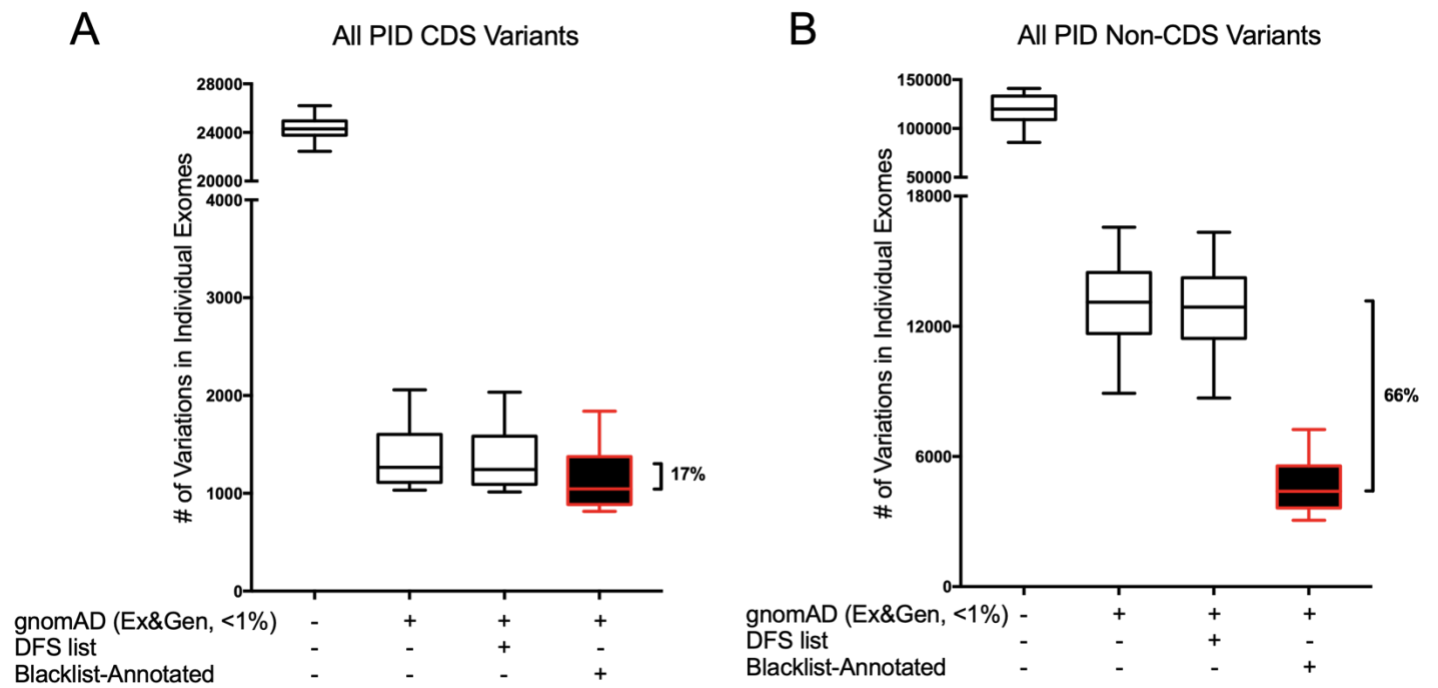

**Figure S2. Filtering of coding sequence (CDS) or non-CDS variants in 3,104 PID exomes with the PID blacklist-annotated.** Exomes were restricted to CDS (A) or non-CDS (B) variants and filtered by removing variants with a MAF greater than 0.01 in gnomAD. The remaining variants were filtered with the blacklist-annotated. Filtering with the DFS list is shown for comparison. Error bars represent the 10th-90th percentiles.

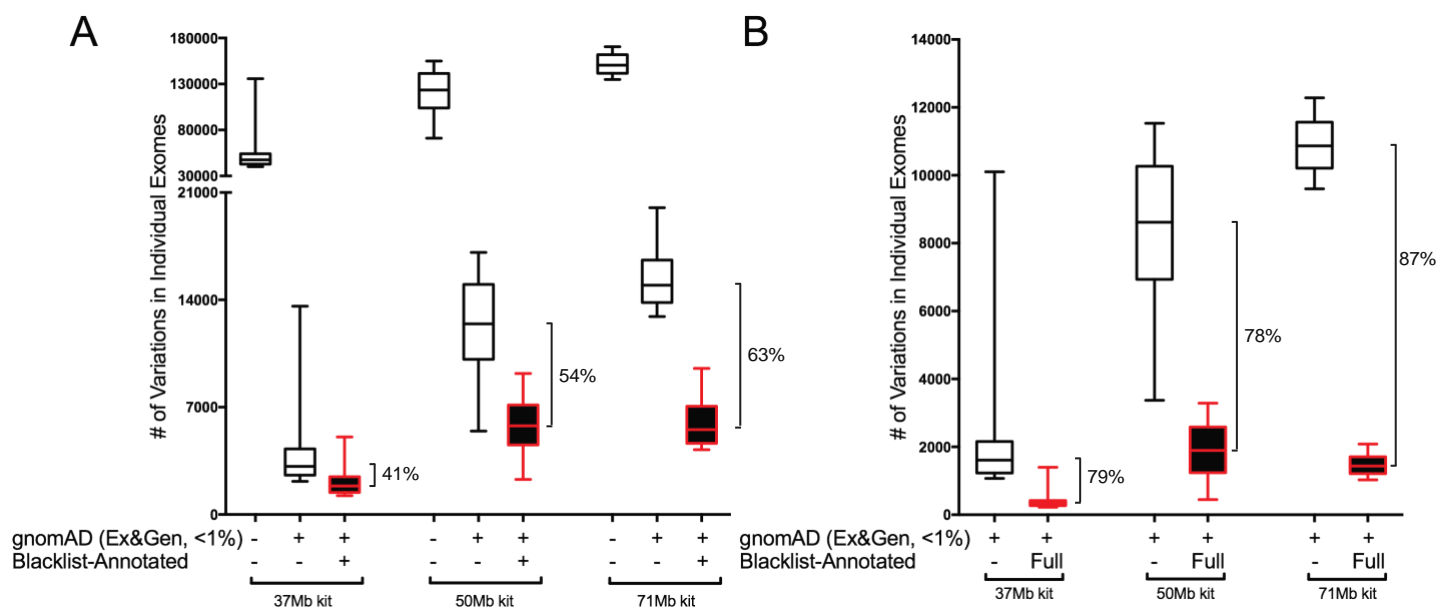

**Figure S3. Filtering of 3,104 PID exomes broken down by the exome capture kit.** PID exomes were captured with one of three SureSelect kits: 37 Mb ( $n = 96$ ), 50 Mb ( $n = 727$ ), or 71 Mb ( $n = 2,281$ ). (A) Filtering of all variants in each exome, using gnomAD and the blacklist-annotated. gnomAD filtering performed by removing variants with a minor allele frequency greater than 0.01 in the databases. (B) Filtering of exomes restricted to cohort-specific variants with the blacklist-annotated. Error bars represent the 10th-90th percentiles.

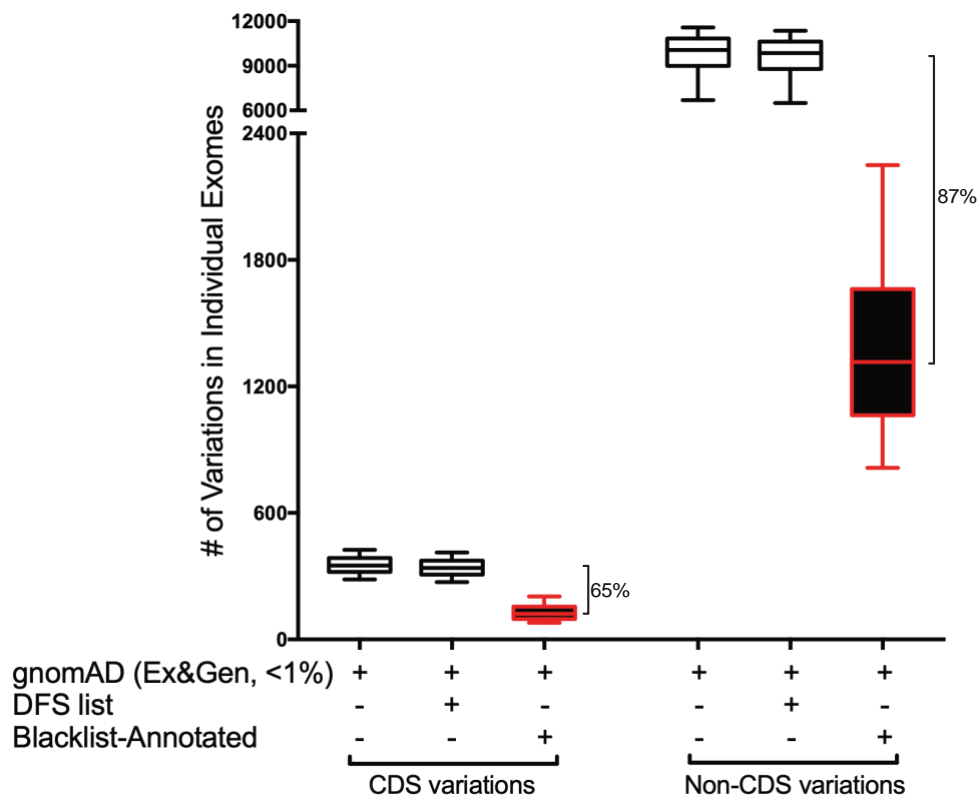

**Figure S4. Filtering of coding sequence (CDS) and non-CDS variants in 3,104 PID exomes restricted to cohort-specific variations using the blacklist-annotated.** DFS list shown for comparison. Error bars represent the 10th-90th percentiles.

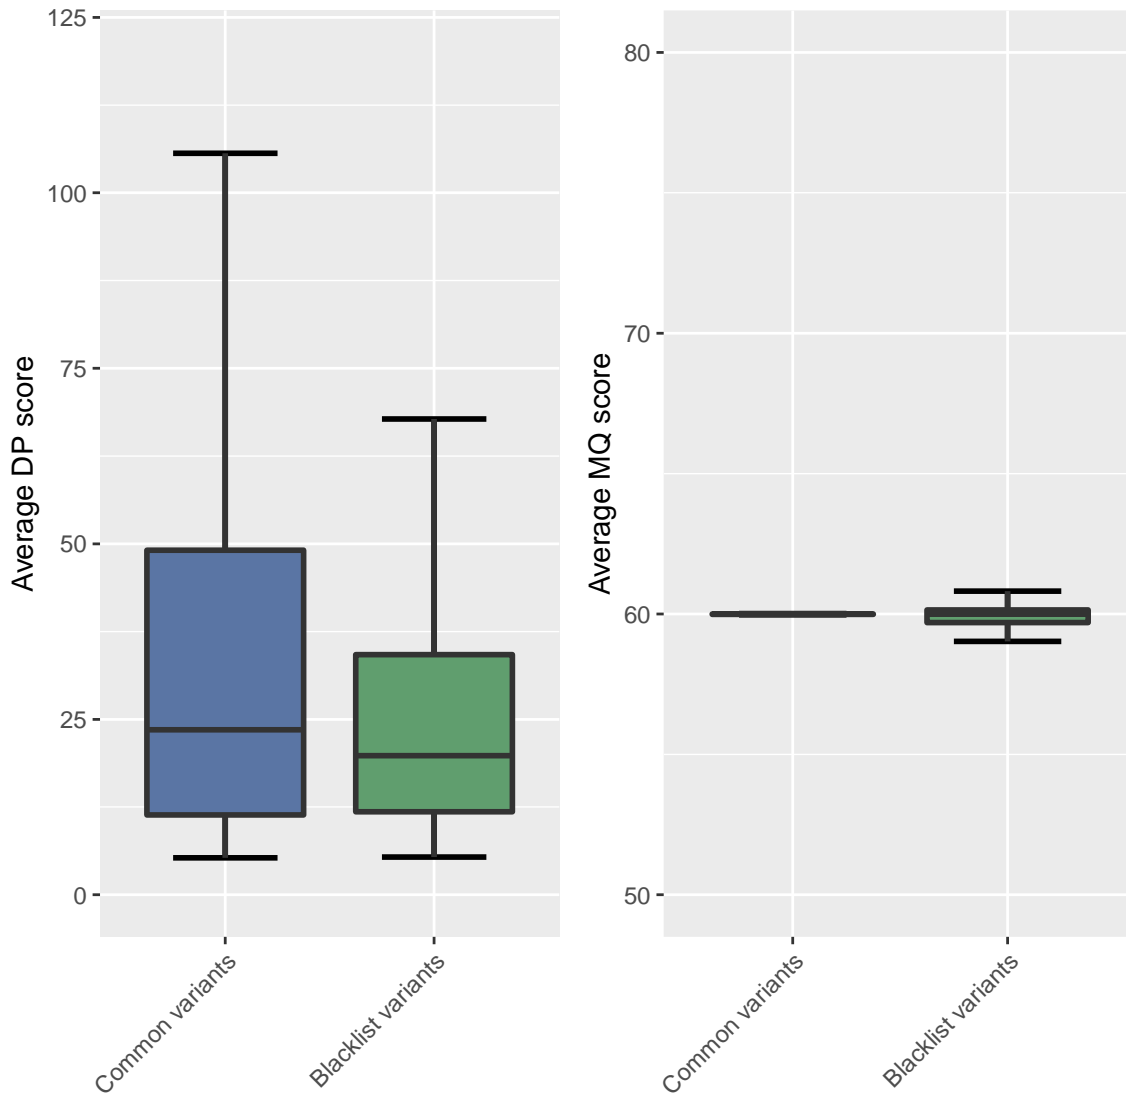

**Figure S5. Comparison of quality metrics for blacklisted and non-blacklisted variants.** Mean (A) read depth (DP) and (B) mapping quality (MQ) were calculated for common variants present in gnomAD with a MAF>1% (blue bar), and for blacklist-annotated variants (green bar). Error bars represent the upper and lower limits of 1.5 times the interquartile range.

### GNOMAD scoring function

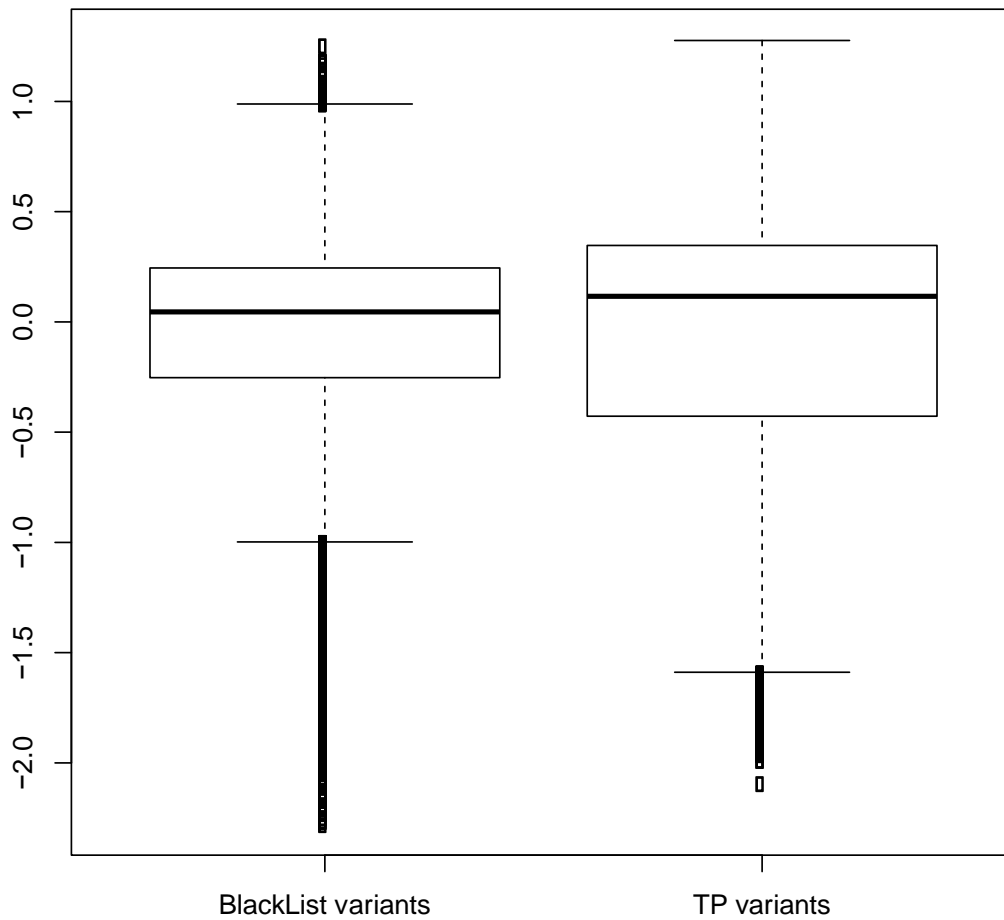

**Figure S6. Comparison with machine learning-based filtering methods.** We applied random forest scoring functions to blacklist-annotated variants and to a set of true-positive (TP) variants present in both the gnomAD dataset and our cohort with a MAF exceeding 1% in each dataset. The score distributions are almost identical, indicating that the blacklist-annotated variants are not distinguishable from TP variants according to this standard classification method.

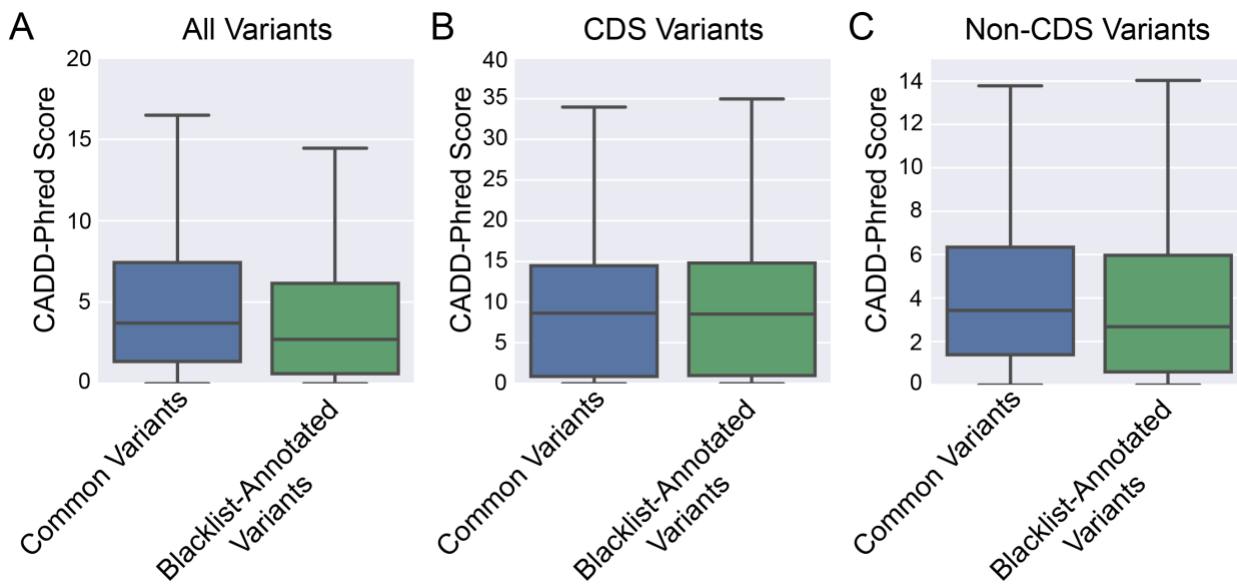

**Figure S7. Comparison of CADD scores between blacklisted and non-blacklisted variants.** Mean CADD scores were calculated for common variants present in gnomAD exome and genome databases with a MAF>1% (blue bar), or blacklist-annotated variants (green bar). Calculations were performed for all (A), CDS (B), and non-CDS (C) variants. Error bars represent the upper and lower limits of 1.5 times the interquartile range.



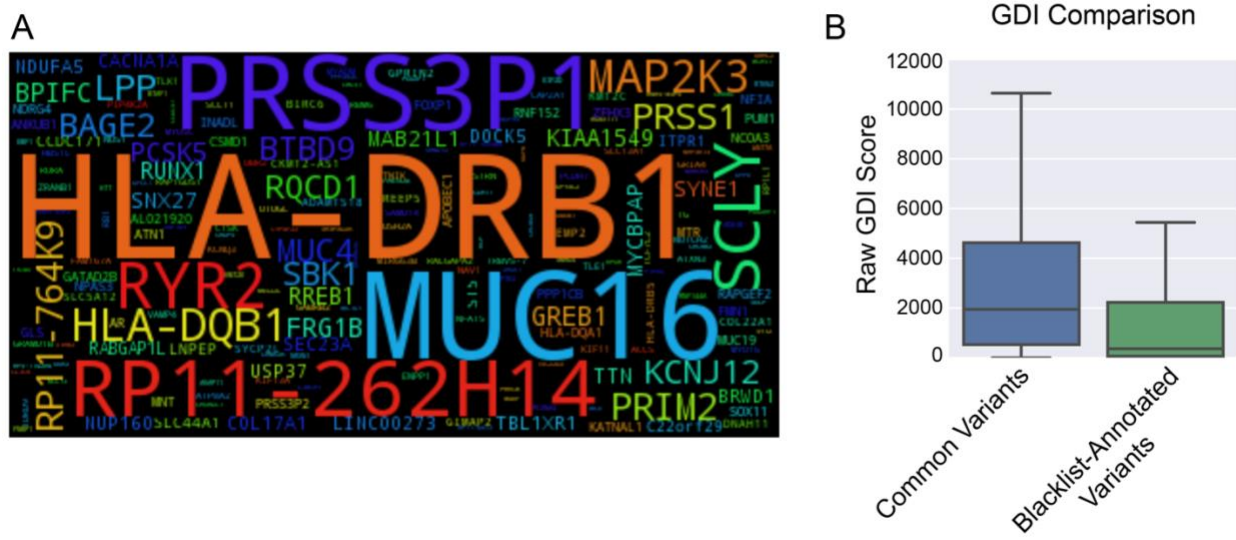

**Figure S8. Characteristics of the most frequent genes in the blacklist-annotated.** (A) Depiction of the top ranking genes in the blacklist-annotated according to the number of variants. The size of the text is proportional to the number of variants of the gene in the blacklist-annotated. (B) Comparison of GDI scores between the 1,000 most common genes in all the common in-house variants (gnomAD) and blacklist-annotated variants. Error bars represent the upper and lower limits of 1.5 times the interquartile range.

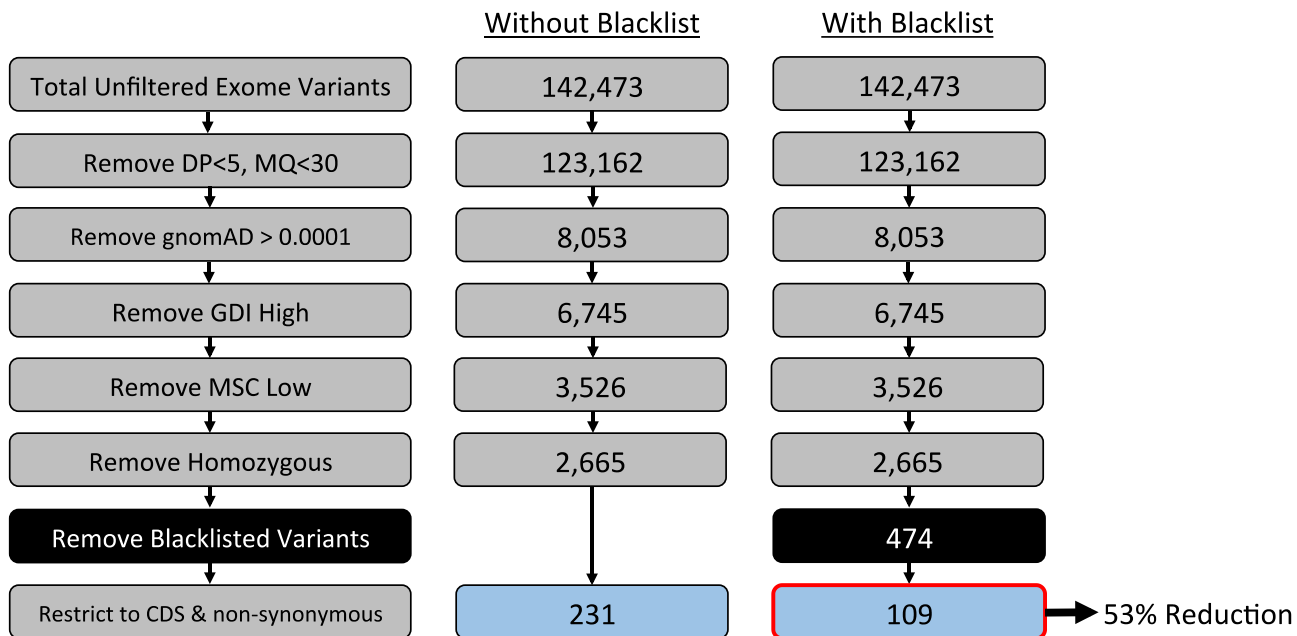

**Figure S9. Practical analysis of a single patient exome by blacklisting.** The practical utility of the blacklist approach was demonstrated with the exome of a patient with a published disease-causing mutation. The patient’s exome was filtered with a standard pipeline with and without application of the blacklist-annotated. The numbers in each box represent the number of variants remaining in the exome after each filtering step. GDI: gene damage index; MSC: mutation significance cutoff.

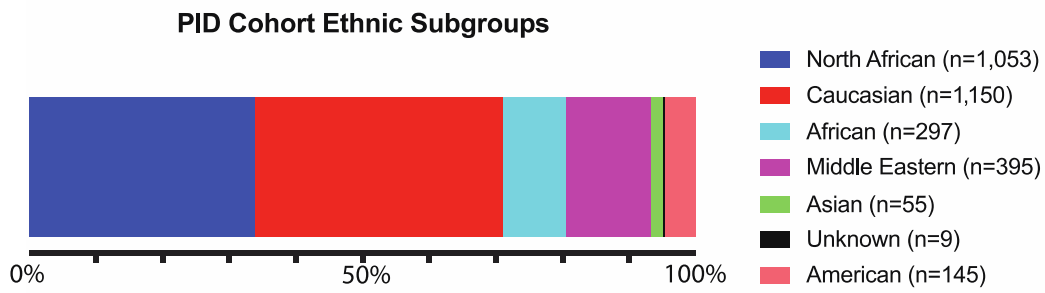

**Figure S10. Representation of ethnic subgroups in 3,104 PID exomes.** The distribution of the genetic ancestry groups in the PID cohort, as determined by PCA analysis.

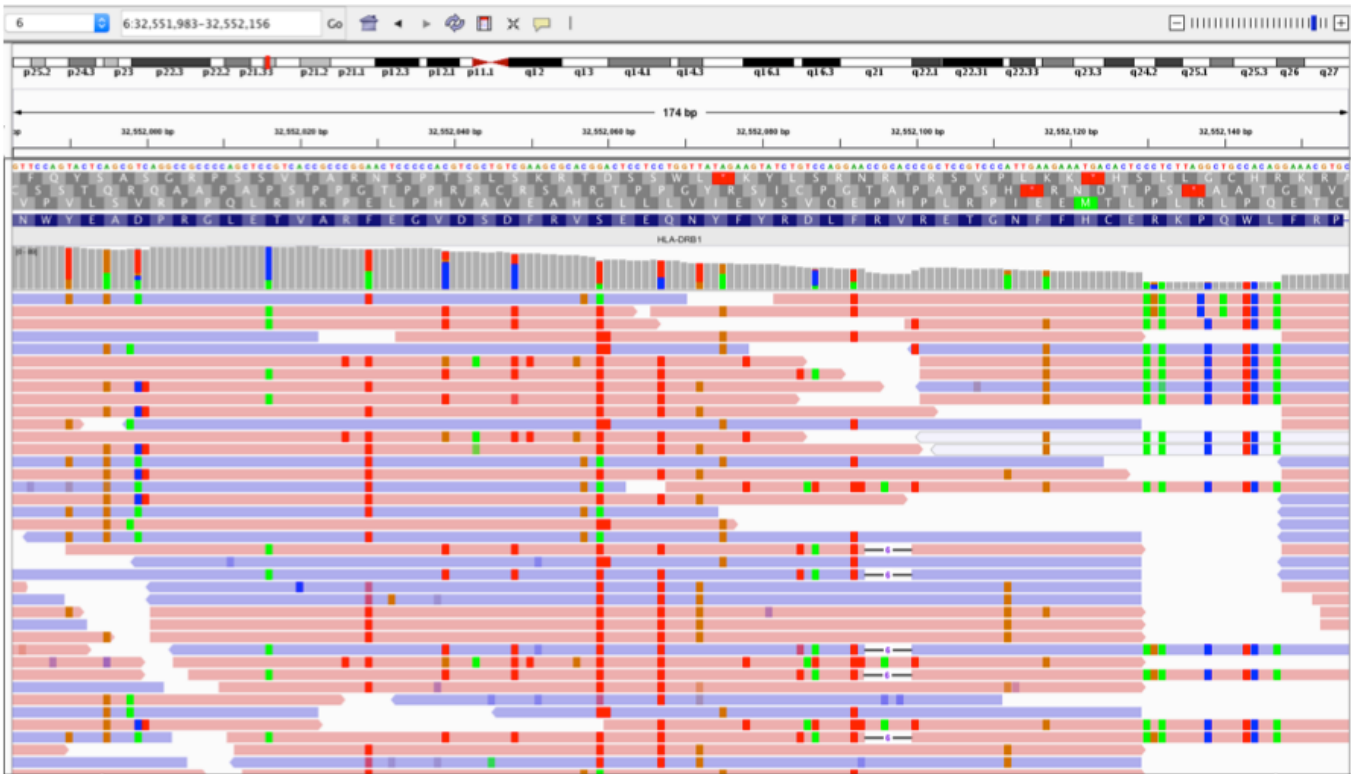

**Figure S11. Investigation of a biallelic *HLA-DRB1* variant: 6-32551960-T-TCC**  
 IGV screenshot of the WES alignment surrounding position 32,551,960 on chromosome 6.

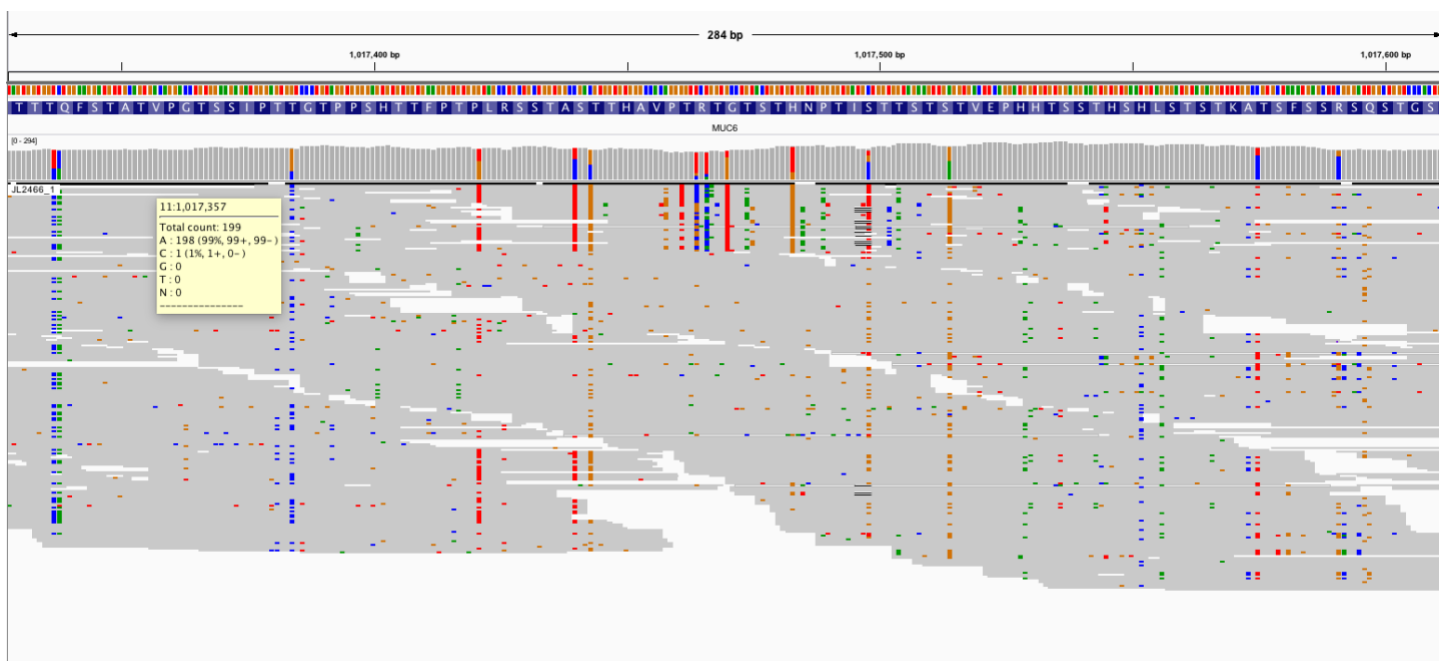

**Figure S12. Investigation of a biallelic *MUC6* variant: 11-1017470-G-T**  
 IGV screenshot of the WES alignment surrounding position 1,017,280 on chromosome 11.

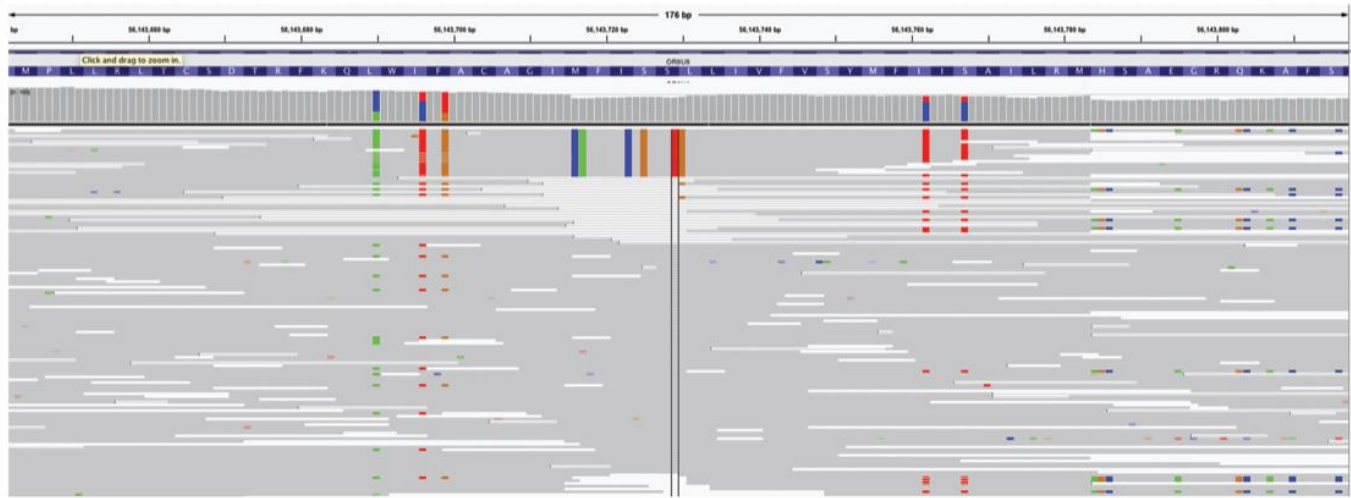

**Figure S13. Investigation of biallelic *OR8U1* variants: 11,56143784,C,T and 11,56143803,A,G**  
IGV screenshot of the WES alignment surrounding position 11,56143784 on chromosome 11.







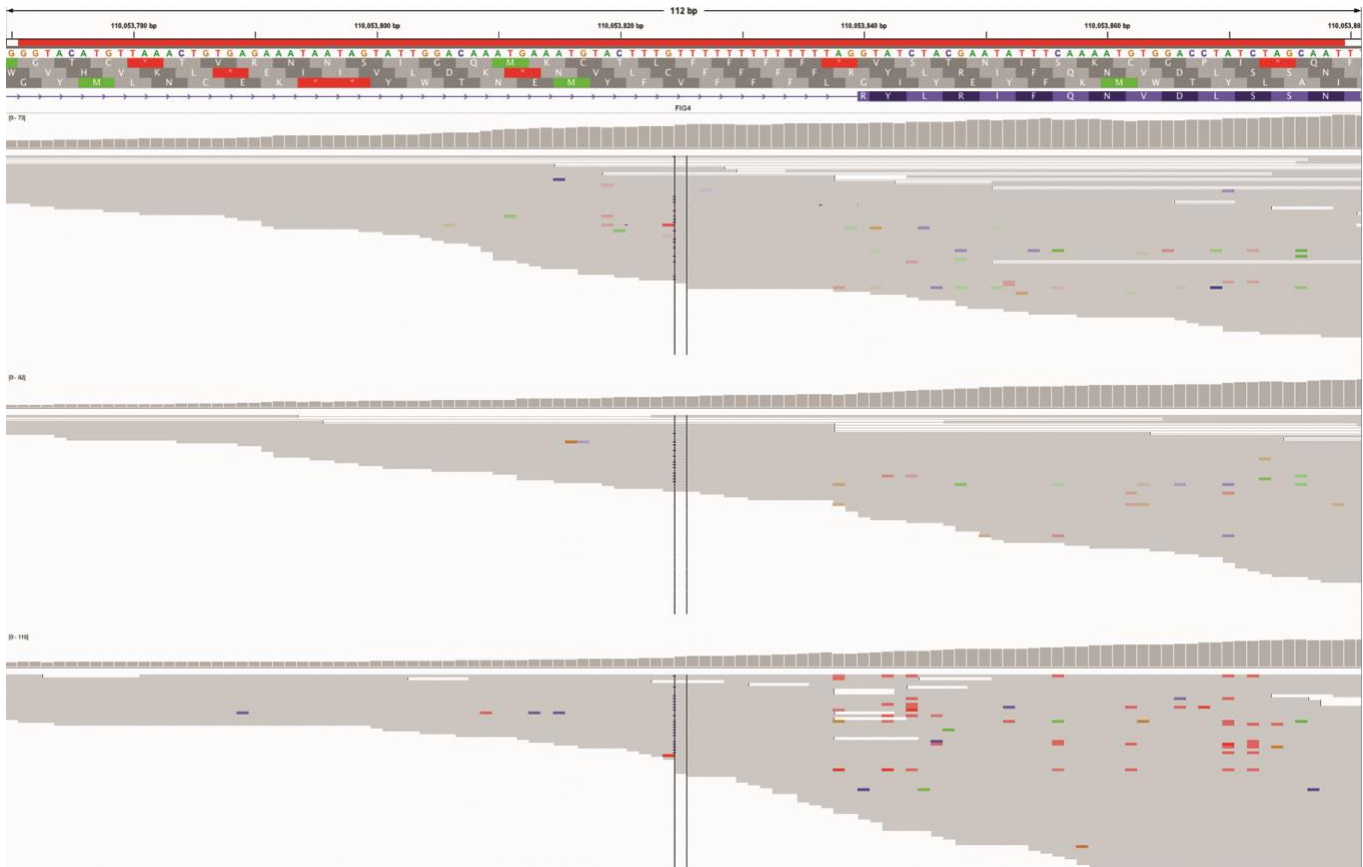

**Figure S16. Investigation of a multiallelic *FIG4* variant: 6-110053824-G-GT**  
 IGV screenshot of the WES alignment at position 110053824 on chromosome 6.

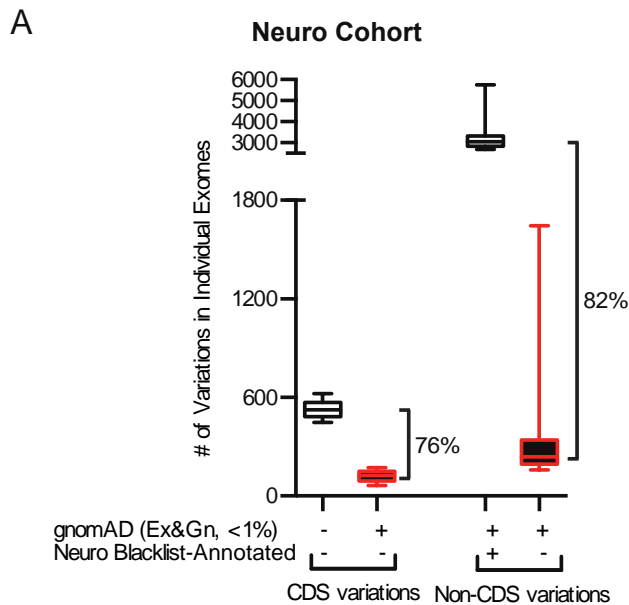

**Figure S17. Filtering of coding and non-coding sequence variants** in (A) 3,869 Neuro exomes restricted to cohort-specific variants with the Neuro blacklist-annotated, (B) 902 Infection exomes restricted to cohort-specific variants with the Infection blacklist-annotated, (C) 400 Africa exomes restricted to cohort-specific variants with the Africa blacklist-annotated. Error bars represent the 10th-90th percentiles.

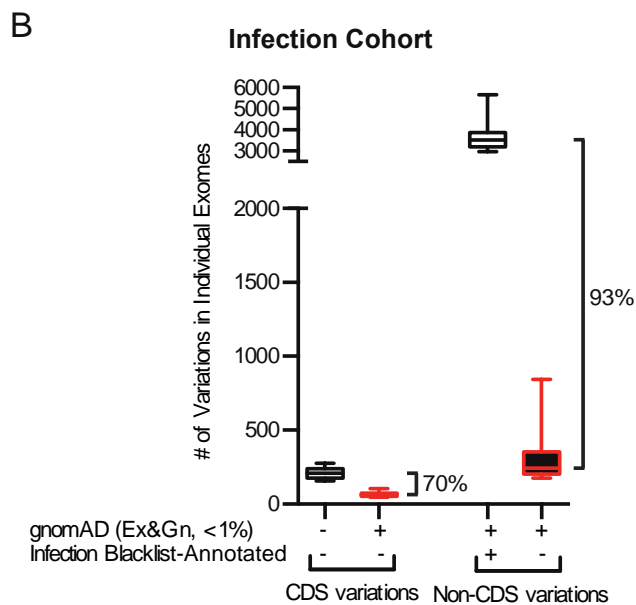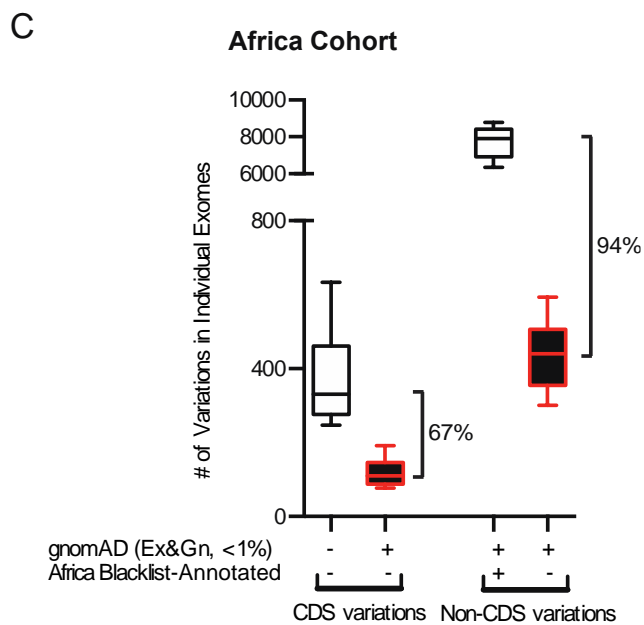

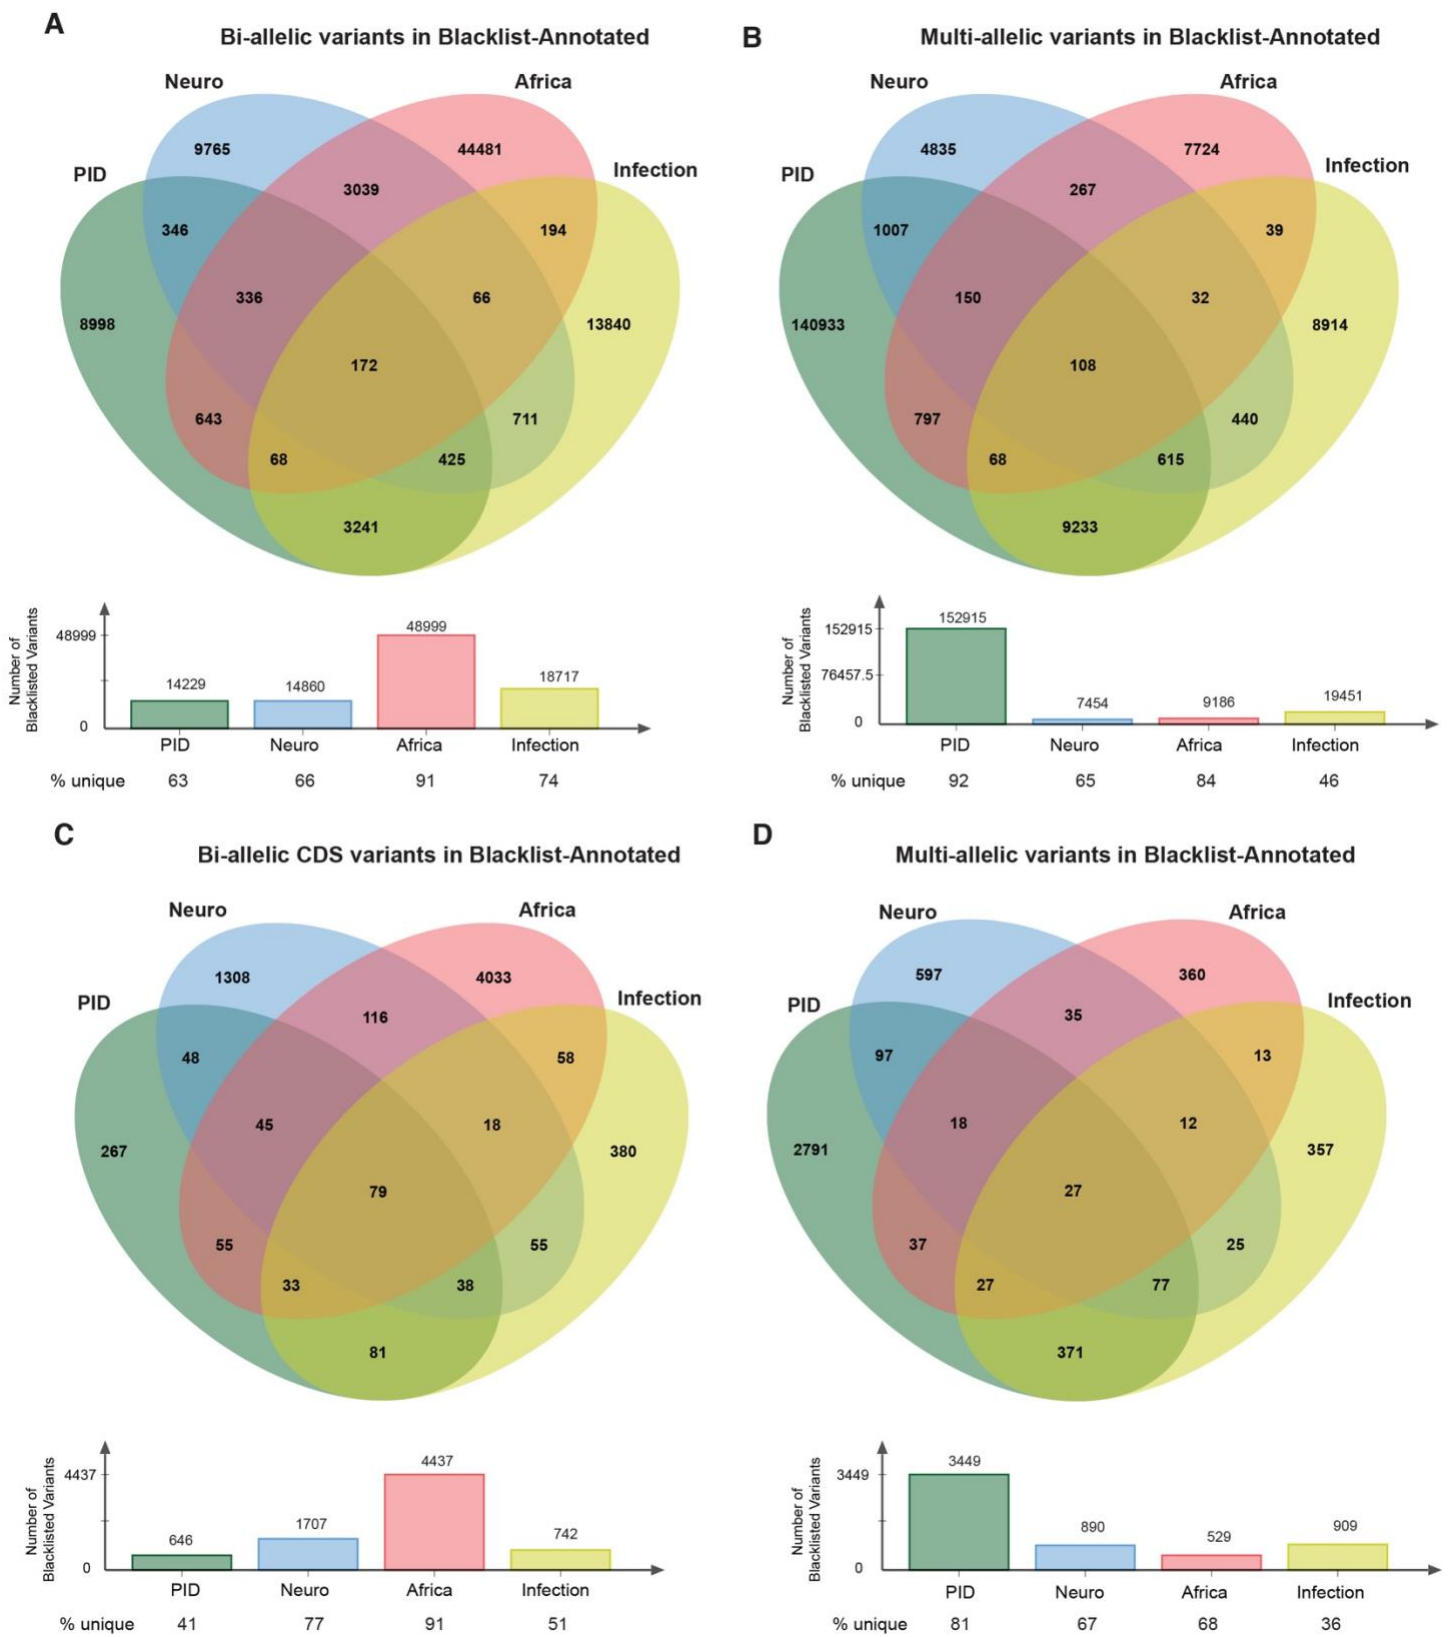

**Figure S18. Relationship between the four blacklists.** Common and unique biallelic (A), multiallelic (B), biallelic restricted to CDS (C), and multiallelic restricted to CDS (D) variants from the Blacklist-Annotated in the PID, Neuro, Africa and Infection cohorts.

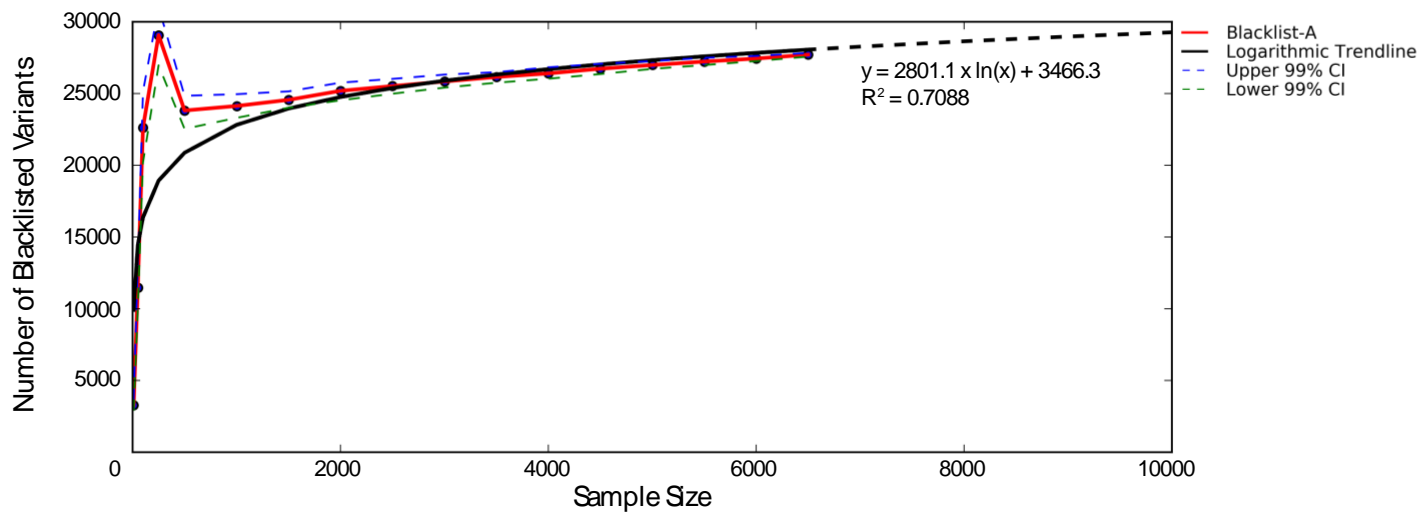

**Figure S19. Relationship between sample size and number of blacklist variants.** Estimation of the number of exomes required to create a saturated blacklist for CDS variants. Overlays in red, gray and green indicate that blacklist generation is unsafe, safe and optimal, respectively. The green vertical line indicates the suggested minimal sample size.

**Table S1. VQSR status of blacklist-annotated (BL-A) variants**

|                  | <b># of VQSR PASS (%)</b> | <b># of VQSR non-PASS (%)</b> |
|------------------|---------------------------|-------------------------------|
| <b>Blacklist</b> | 125,614 (75.2%)           | 41,530 (24.8%)                |

**Table S2. Blacklist-annotated variants in HGMD or ClinVar database**

| Chr | Position  | Ref. | Alt. | HGMD | ClinVar | gnomAD | Gene   | Disease                                 | Status                     | Consequence             | cDNA                 | Protein           | rs ID                       | Publication (PMID)                                                             |
|-----|-----------|------|------|------|---------|--------|--------|-----------------------------------------|----------------------------|-------------------------|----------------------|-------------------|-----------------------------|--------------------------------------------------------------------------------|
| 4   | 88929173  | C    | CGAG | x    |         | PASS   | PKD2   |                                         |                            | inframe insertion       | c.307_308insAGG      | p.Glu102dup       | <a href="#">rs547253972</a> |                                                                                |
| 8   | 100844596 | G    | T    | x    | x       | -      | VPS13B | Cohen syndrome                          |                            | splice acceptor variant | c.9406-1G>T          |                   | <a href="#">rs386834119</a> | 23188044, 16917849, 15154116                                                   |
| 10  | 89720633  | C    | CT   | x    | x       | PASS   | PTEN   | Hereditary cancer-predisposing syndrome |                            | intron                  | c.802-18C>T          |                   | <a href="#">rs376702513</a> | <a href="#">25394175</a> , <a href="#">18951446</a>                            |
| 12  | 102796022 | A    | T    | x    | x       | PASS   | IGF1   | Insulin-like growth factor I deficiency | beginn/likely benign       | 3' UTR variant          | c.*297T>A            |                   | <a href="#">rs70961704</a>  |                                                                                |
| 13  | 20763685  | A    | AC   | x    | x       | PASS   | GJB2   | Deafness, autosomal recessive 1         | 2 alleles one closed to 1% | frameshit               | c.35dupG             | p.Val13CysfsTer35 | <a href="#">rs398123814</a> | <a href="#">9482292</a> , <a href="#">24503448</a>                             |
| 21  | 47545369  | A    | AC   | x    |         | PASS   | COL6A2 |                                         |                            | frameshit               | c.1817-10_1817-9insC | p.Asp163ArgfsTer3 | <a href="#">rs149954350</a> |                                                                                |
| X   | 66765161  | A    | T    | x    | x       | PASS   | AR     | Infertility, male                       | Not tested.                | Missense                | c.173A>T             | Gln58Leu          | <a href="#">rs200185441</a> | <a href="#">12801573</a> , <a href="#">24737579</a> , <a href="#">23637914</a> |
| X   | 153006092 | C    | T    | x    |         | RF;AC0 | ABCD1  |                                         |                            | stop gained             | c.1699C>T            | p.Gln567Ter       | <a href="#">rs201114595</a> |                                                                                |

**Table S3. Biallelic and multi-allelic blacklist-annotated variants in the PID, Neuro, Infection and Africa cohorts**

| Blacklists       | Biallelic  |            | Multiallelic |            | Total  |            |
|------------------|------------|------------|--------------|------------|--------|------------|
|                  | Count      | % of Total | Count        | % of Total | Count  | % of Total |
|                  | <b>PID</b> | 14,229     | 8.5          | 152,915    | 91.5   | 167,144    |
| <b>Neuro</b>     | 14,860     | 66.6       | 7,454        | 33.4       | 22,314 | 100        |
| <b>Infection</b> | 18,717     | 49.0       | 19,451       | 51.0       | 38,168 | 100        |
| <b>Africa</b>    | 48,999     | 84.2       | 9,186        | 15.8       | 58,185 | 100        |

**Table S4. Bi-allelic and multi-allelic blacklist-annotated variants by repetitive regions**

(STR: short tandem repeats, Alu, GC-rich regions, other repetitive regions)

| Occurrence of blacklisted variants in complex regions |               |            |            |            |         |            |
|-------------------------------------------------------|---------------|------------|------------|------------|---------|------------|
|                                                       | Multi-allelic |            | Bi-allelic |            | Total   |            |
|                                                       | Count         | % of Total | Count      | % of Total | Count   | % of Total |
| <b>In complex regions</b>                             | 118,154       | 77.3       | 6,711      | 47.2       | 124,865 | 74.7       |
| <b>Not in complex regions</b>                         | 34,761        | 22.7       | 7,518      | 52.8       | 42,279  | 25.3       |
|                                                       |               |            |            |            |         |            |
| Breakdown by complex regions                          |               |            |            |            |         |            |
|                                                       | Multi-allelic |            | Bi-allelic |            | Total   |            |
|                                                       | Count         | % of Total | Count      | % of Total | Count   | % of Total |
| <b>STR</b>                                            | 65,646        | 55.6       | 2,457      | 36.6       | 68,103  | 53.5       |
| <b>Alu elements</b>                                   | 44,866        | 38.0       | 1,713      | 25.5       | 46,579  | 36.7       |
| <b>GC-rich regions</b>                                | 4,314         | 3.7        | 1,742      | 26.0       | 6,056   | 6.2        |
| <b>Other repeat regions</b>                           | 3,328         | 2.8        | 799        | 11.9       | 4,127   | 3.6        |



**Table S5. Hardy-Weinberg of bi-allelic CDS blacklist-annotated (BL-A) variants in Caucasian individuals**

| CDS bi-allelic variants in Caucasian Individuals (n = 1150)  |                   |                    |                  |
|--------------------------------------------------------------|-------------------|--------------------|------------------|
| Total                                                        | <10 <sup>-8</sup> | >=10 <sup>-8</sup> | % Disequilibrium |
| 622                                                          | 74                | 548                | 12               |
| CDS bi-allelic variants in disequilibrium by excess genotype |                   |                    |                  |
|                                                              | excess het        | excess hom alt     | excess hom WT    |
| Counts                                                       | 35                | 28                 | 11               |
| %                                                            | 47.3              | 37.8               | 14.9             |
| DP                                                           | 163.0             | 20.5               | 15.6             |

**Table S6. Ethnicity distribution of bi-allelic CDS blacklist-annotated (BL-A) variants in Hardy-Weinberg equilibrium**

| Ethnicity Distribution of CDS bi-allelic variants in HW equilibrium |                |                   |                   |                           |
|---------------------------------------------------------------------|----------------|-------------------|-------------------|---------------------------|
|                                                                     | Total          | <10 <sup>-8</sup> | >10 <sup>-8</sup> | Ethnic Disequilibrium (%) |
| Counts                                                              | 548            | 200               | 348               | 36.5                      |
|                                                                     |                |                   |                   |                           |
| Causal Ethnicity for Disequilibrium                                 |                |                   |                   |                           |
|                                                                     | Middle Eastern | African           | Caucasian         |                           |
| Counts                                                              | 20             | 20                | 6                 |                           |
| %                                                                   | 43.5           | 43.5              | 13.0              |                           |

**Table S7: Biallelic blacklist annotated CDS variants in Hardy-Weinberg disequilibrium**

| Var                                                                                      | Gene     | Unique   | Exome_gnomAD       | Genome_gnomAD          | Obs het | Obs hom | Obs wt | HW_Disequilibrium | DP Avg | Figure         |
|------------------------------------------------------------------------------------------|----------|----------|--------------------|------------------------|---------|---------|--------|-------------------|--------|----------------|
| 4,88536886,CAGTGACAGCAGCAACAGCAGTGACAGCAGCGAT_C                                          | DSPP     | unique   | PASS               | PASS                   | 352     | 75      | 150    | 7.01E-09          | 50     |                |
| 6,136599910,T,TGTATCGCTTCTTCTAGAATGAGATCTTGATCTTGATCA                                    | BCLAF1   | unique   | PASS               | ACO;RF                 | 348     | 0       | 797    | 1.33E-09          | 210    |                |
| 6,31324025,G,GT                                                                          | HLA-B    | unique   | PASS               | PASS                   | 689     | 43      | 401    | 3.1E-32           | 23     |                |
| 6,31324603,C,T                                                                           | HLA-B    | unique   | PASS               | PASS                   | 717     | 253     | 173    | 1.18E-18          | 61     |                |
| 6,32489852,A,ACGG                                                                        | HLA-DRB1 | unique   | PASS               | RF                     | 608     | 102     | 357    | 9.33E-12          | 49     |                |
| 6,32551960,T,TCC                                                                         | HLA-DRB1 | multi-01 | PASS               | PASS                   | 631     | 113     | 394    | 1.03E-09          | 90     | Sup. Figure 11 |
| 6,32552056,A,G                                                                           | HLA-DRB1 | multi-01 | RF                 | InbreedingCoeff;RF     | 720     | 0       | 425    | 2.62E-54          | 152    | Sup. Figure 11 |
| 6,32552085,G,GC                                                                          | HLA-DRB1 | multi-01 | PASS               | InbreedingCoeff        | 950     | 47      | 148    | 1.35E-114         | 124    | Sup. Figure 11 |
| 6,32552093,A,T                                                                           | HLA-DRB1 | multi-01 | RF                 | RF                     | 528     | 0       | 610    | 2.2E-24           | 109    | Sup. Figure 11 |
| 6,32552140,T,A                                                                           | HLA-DRB1 | multi-01 | PASS               | PASS                   | 846     | 16      | 253    | 3.37E-86          | 64     | Sup. Figure 11 |
| 6,32552144,A,C                                                                           | HLA-DRB1 | multi-01 | PASS               | PASS                   | 953     | 28      | 119    | 1.13E-134         | 58     | Sup. Figure 11 |
| 6,32557610,T,C                                                                           | HLA-DRB1 | multi-01 | .                  | .                      | 451     | 0       | 693    | 1.01E-16          | 55     | Sup. Figure 11 |
| 7,100550245,G,T                                                                          | MUC3A    | unique   | InbreedingCoeff    | InbreedingCoeff        | 533     | 0       | 192    | 3.3E-55           | 547    |                |
| 7,100551331,G,T                                                                          | MUC3A    | unique   | PASS               | PASS                   | 850     | 0       | 177    | 2.49E-113         | 508    |                |
| 7,142470773,A,G                                                                          | PRSS3P1  | unique   | .                  | .                      | 992     | 0       | 153    | 1.85E-147         | 213    |                |
| 7,142231826,T,C                                                                          | TRBV10-1 | unique   | PASS               | PASS                   | 1046    | 0       | 99     | 4.59E-178         | 236    |                |
| 10,94018,T,G                                                                             | TUBB8    | unique   | RF;ACO             | ACO;InbreedingCoeff;RF | 404     | 0       | 729    | 2.81E-13          | 51     |                |
| 11,1093430,C,CCACCACGGTGACCCCAACCCCAACCCACCCACGGCACACAG<br>ACCCCAACAACGACACCCATCAGCACCAA | MUC2     | unique   | PASS               | PASS                   | 740     | 0       | 404    | 8.39E-59          | 171    |                |
| 11,1016961,G,T                                                                           | MUC6     | multi-02 | RF;ACO             | ACO;RF                 | 444     | 0       | 700    | 3.83E-16          | 306    | Sup. Figure 12 |
| 11,1016972,G,A                                                                           | MUC6     | multi-02 | .                  | InbreedingCoeff;RF     | 733     | 0       | 411    | 3.16E-57          | 280    | Sup. Figure 12 |
| 11,1017040,G,GA                                                                          | MUC6     | multi-02 | RF;InbreedingCoeff | InbreedingCoeff;RF     | 863     | 0       | 281    | 3.01E-93          | 237    | Sup. Figure 12 |
| 11,1017458,A,G                                                                           | MUC6     | multi-02 | RF;ACO             | InbreedingCoeff;RF     | 1055    | 0       | 89     | 3.72E-184         | 231    | Sup. Figure 12 |
| 11,1017470,G,T                                                                           | MUC6     | multi-02 | .                  | .                      | 908     | 0       | 70     | 1.12E-161         | 253    | Sup. Figure 12 |
| 11,1018483,C,G                                                                           | MUC6     | multi-02 | InbreedingCoeff    | InbreedingCoeff        | 1015    | 0       | 129    | 3.5E-160          | 110    | Sup. Figure 12 |
| 11,48387118,G,A                                                                          | OR4C5    | unique   | InbreedingCoeff    | InbreedingCoeff        | 1144    | 0       | 0      | 9.03E-251         | 125    |                |
| 11,56143784,C,T                                                                          | OR8U1    | multi-03 | InbreedingCoeff    | InbreedingCoeff        | 1102    | 0       | 42     | 8.52E-217         | 122    | Sup. Figure 13 |
| 11,56143803,A,G                                                                          | OR8U1    | multi-03 | InbreedingCoeff    | InbreedingCoeff        | 1071    | 0       | 73     | 1.1E-194          | 117    | Sup. Figure 13 |
| 12,11244067,A,ATT                                                                        | TAS2R43  | multi-04 | PASS               | ACO;RF                 | 660     | 203     | 266    | 6.36E-09          | 60     |                |
| 12,11244070,T,C                                                                          | TAS2R43  | multi-04 | PASS               | PASS                   | 665     | 210     | 251    | 8.68E-10          | 60     |                |
| 15,23685604,TC,T                                                                         | GOLGA6L2 | unique   | InbreedingCoeff    | InbreedingCoeff        | 970     | 1       | 159    | 1.23E-140         | 308    |                |
| 15,23686113,C,CTGCTTACATCTTCTCG                                                          | GOLGA6L2 | unique   | PASS               | RF                     | 342     | 0       | 785    | 1.92E-09          | 401    |                |
| 15,90294306,C,A                                                                          | MESP1    | unique   | PASS               | PASS                   | 649     | 172     | 270    | 4.5E-11           | 23     |                |
| 19,8999561,G,C                                                                           | MUC16    | unique   | RF                 | InbreedingCoeff;RF     | 619     | 0       | 525    | 4.27E-36          | 69     |                |
| 19,4511350,T,A                                                                           | PLIN4    | unique   | .                  | InbreedingCoeff        | 713     | 417     | 6      | 1.05E-50          | 140    |                |
| 19,50463670,T,G                                                                          | SIGLEC11 | unique   | PASS               | PASS                   | 404     | 9       | 730    | 3.97E-09          | 42     |                |

**Table S8. Sanger sequencing of 3 variants from blacklist annotated in patient exomes.**

| Variant        |     |             |     |     | Characterization |        |                             |               |      |                      | Databases                |            |               | Quality |         |         | WES Total       |      |      | WES Genotype of 10 individuals |     |     | Sanger sequence of 10 individuals |     |     | Variant Status |     |     |         |                    |                  |
|----------------|-----|-------------|-----|-----|------------------|--------|-----------------------------|---------------|------|----------------------|--------------------------|------------|---------------|---------|---------|---------|-----------------|------|------|--------------------------------|-----|-----|-----------------------------------|-----|-----|----------------|-----|-----|---------|--------------------|------------------|
| Gene           | Chr | Pos         | Ref | Alt | BL category      | Diseq. | HW Eq. p-value <sup>a</sup> | Repeat region | CCDS | Ethnic Heterogeneity | % of cohort with variant | ExAC 0.3.1 | GnomAD r2.0.2 | Mean DP | Mean MQ | Mean QD | WT <sup>c</sup> | Het  | Hom  | WT <sup>c</sup>                | Het | Hom | WT                                | Het | Hom | WT             | Het | Hom | Variant | Call problem       | Suspected reason |
| <i>HRNR</i>    | 1   | 152,195,728 | AT  | A   | Multi allelic    | nd     | nd                          | No            | No   | nd                   | 98.3                     | -          | Yes           | 42.3    | 60.2    | 18.3    | 44              | 170  | 2890 | 0                              | 0   | 10  | nc                                | nc  | nc  | nc             | nc  | nc  | Yes     | Short stretch of T |                  |
| <i>TBC1D19</i> | 4   | 26,737,063  | C   | CT  | Multi allelic    | nd     | nd                          | No            | No   | nd                   | 91.8                     | -          | Yes           | 24.1    | 60.2    | 15.1    | 210             | 877  | 2017 | 0                              | 5   | 5   | nc                                | nc  | nc  | nc             | nc  | nc  | Yes     | Short stretch of T |                  |
| <i>FIG4</i>    | 6   | 110,053,824 | G   | GT  | Multi allelic    | nd     | nd                          | No            | No   | nd                   | 88.6                     | -          | Yes           | 28.4    | 60.0    | 13.9    | 349             | 1231 | 1524 | 0                              | 6   | 4   | nc                                | nc  | nc  | nc             | nc  | nc  | Yes     | Short stretch of T |                  |

nc : Not confirmed by Sanger sequencing due to poor quality.

**Table S9. Summary of the technology employed for each cohort**

| <b>Cohort</b>    |             |                                            |                  |                |                         |                |                  |
|------------------|-------------|--------------------------------------------|------------------|----------------|-------------------------|----------------|------------------|
|                  | <b>Size</b> | <b>Kit</b>                                 | <b>Sequencer</b> | <b>Aligner</b> | <b>Reference Genome</b> | <b>Caller</b>  | <b>Annotator</b> |
| <b>PID</b>       | 3,104       | Agilent 37, 50, 71 Mb                      | Hiseq 2000, 2500 | bwa(v0.7.12)   | hg19                    | GATK (v3.4-46) | snpEff           |
| <b>Neuro</b>     | 3,869       | Agilent 50 Mb                              | Hiseq 2000       | bwa (v0.7.5)   | GRCh37                  | GATK (v.3.1-1) | snpEff           |
| <b>Africa</b>    | 400         | Nextera Rapid Capture Expanded Exome 61 Mb | Hiseq 2500       | bwa (v0.7.7)   | GRCh37                  | GATK (v.3.5 )  | snpEff           |
| <b>Infection</b> | 902         | Agilent 50 Mb, Illumina 65Mb               | Hiseq 2000, 2500 | bwa (v0.7.10)  | hg19<br>decoy           | GATK (v3.8 )   | snpEff           |

**Table S10. Primers for PCR and sanger sequencing**

| <b>Gene</b>    | <b>Forward primer (5' → 3')</b> | <b>Reverse primer (5' → 3')</b> |
|----------------|---------------------------------|---------------------------------|
| <i>FIG4</i>    | CTGTCTTGCCCAAAGTCTGC            | TTCTCATTCTGCTTTTACCCGC          |
| <i>HRNR</i>    | GCGTGGAGTTCTTACCTC              | CACTCTTGCTACATGGCTTG            |
| <i>TBC1D19</i> | CTTCTGACATTATGAACAGAG           | GTGATTAGAAATAAAGTGGTG           |
